# Supplementary material for: Immunophenotype of T Cells Expressing Programmed Death-1 and Cytotoxic T Cell Antigen-4 in Early Lung Cancer: Local vs. Systemic Immune Response
Source: MDPI journal article supplement (doi:10.3390/cancers11040567), 2019-04-21

# Supplementary Material: Immunophenotype of T Cells Expressing Programmed Death-1 and Cytotoxic T Cell Antigen-4 in Early Lung Cancer: Local vs. Systemic Immune Response

Iwona Kwiecien, Tomasz Skirecki, Małgorzata Polubiec-Kownacka, Agata Raniszewska and Joanna Domagala-Kulawik

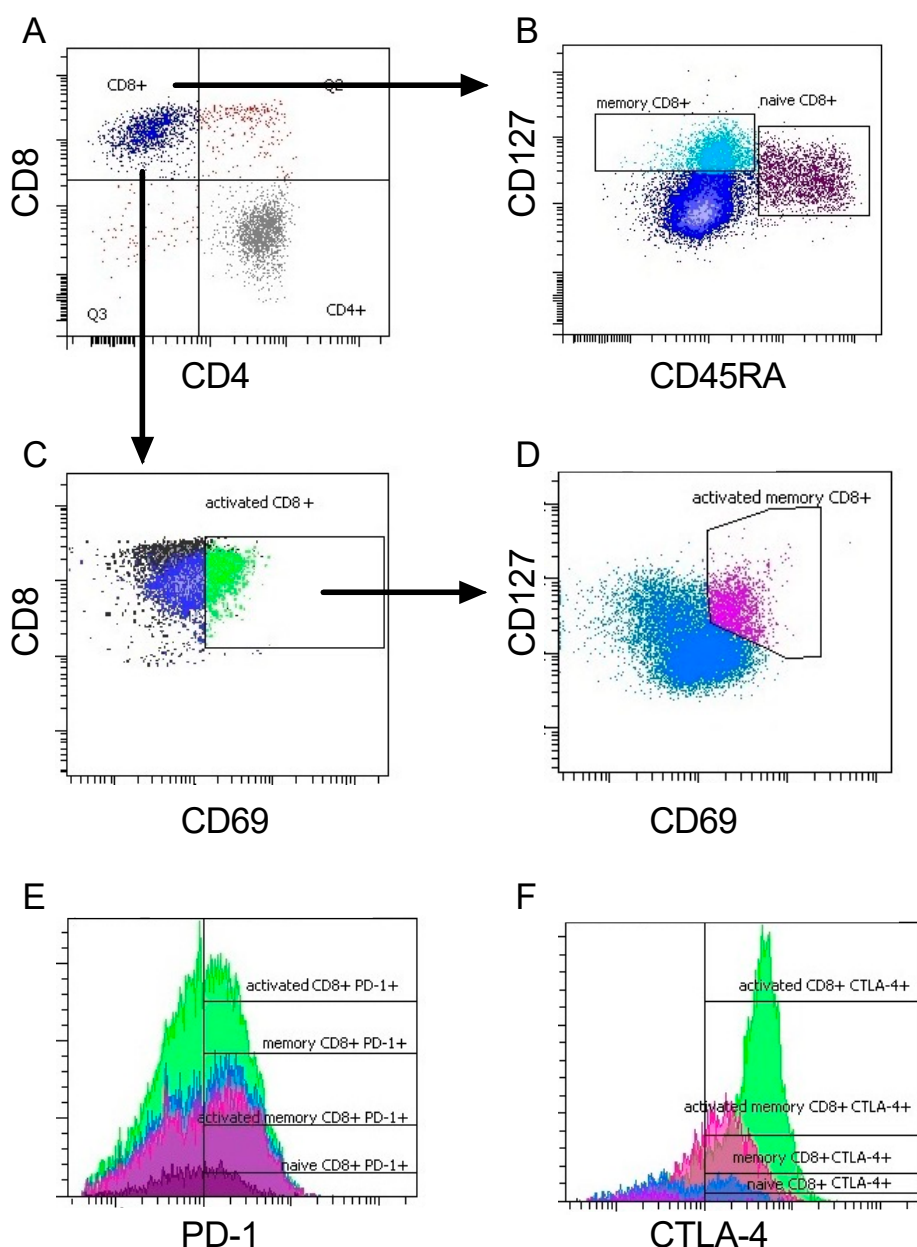

**Figure S1.** Scatter plots and histograms with gating strategy for CD8+ cells subpopulations from the bronchoalveolar lavage fluid from the lung affected by cancer (cBALF). (A) Scatter plot showing CD3+ lymphocytes. (B) Gating of CD8+ naive and memory T cells. (C) Gating of activated CD8+ T cells. (D) Scatter plot from C (CD8+CD69+) for analysis of activated memory CD8 T cells. (E) Expression of the PD-1 on the abovementioned CD8+ subpopulations. (F) Expression of CTLA-4 on the abovementioned CD8+ subpopulations.

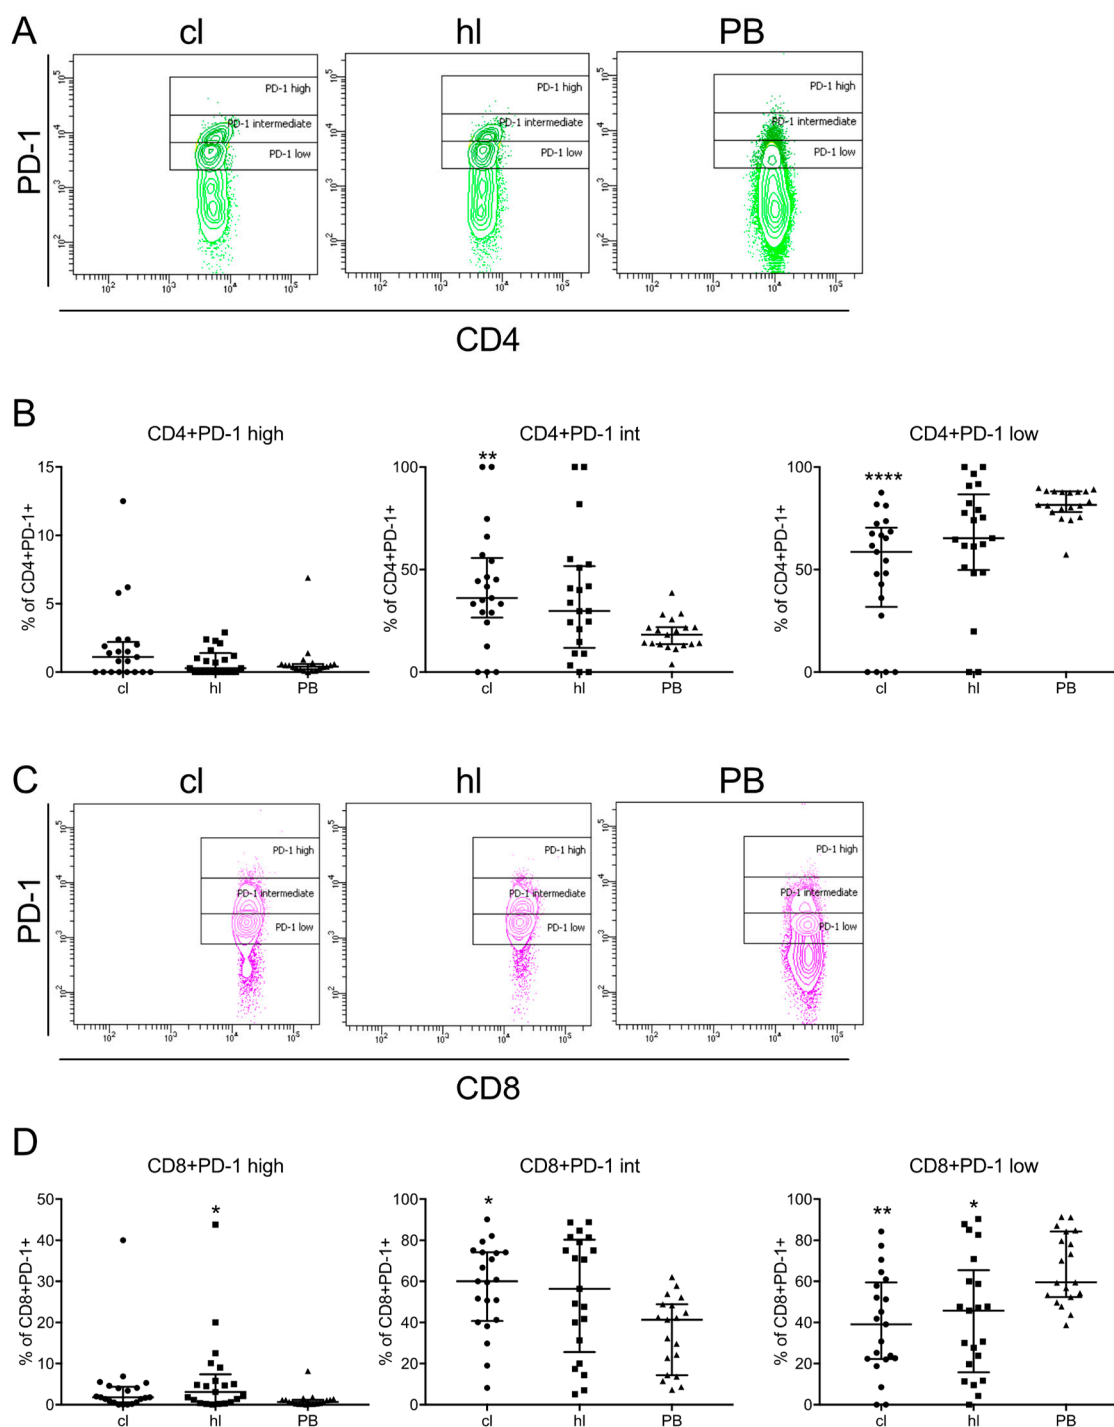

**Figure S2.** Subpopulations of PD-1-positive T cells in lung cancer. **(A)** Representative staining of PD-1 on CD4+PD-1+ cells of the BALF from cancer affected lung (cl), healthy lung (h) and peripheral blood (PB). **(B)** comparison of the proportions of subpopulations of CD4+PD-1+ T cells. **(C)** representative dot plots of CD8+PD-1+ cells. **(D)** comparison of the proportions of subpopulations of CD8+PD-1+ T cells at different sites. Differences between groups were assessed by the Anova Kruskal-Wallis test. \*  $p < 0.001$  between given compartment and peripheral blood.

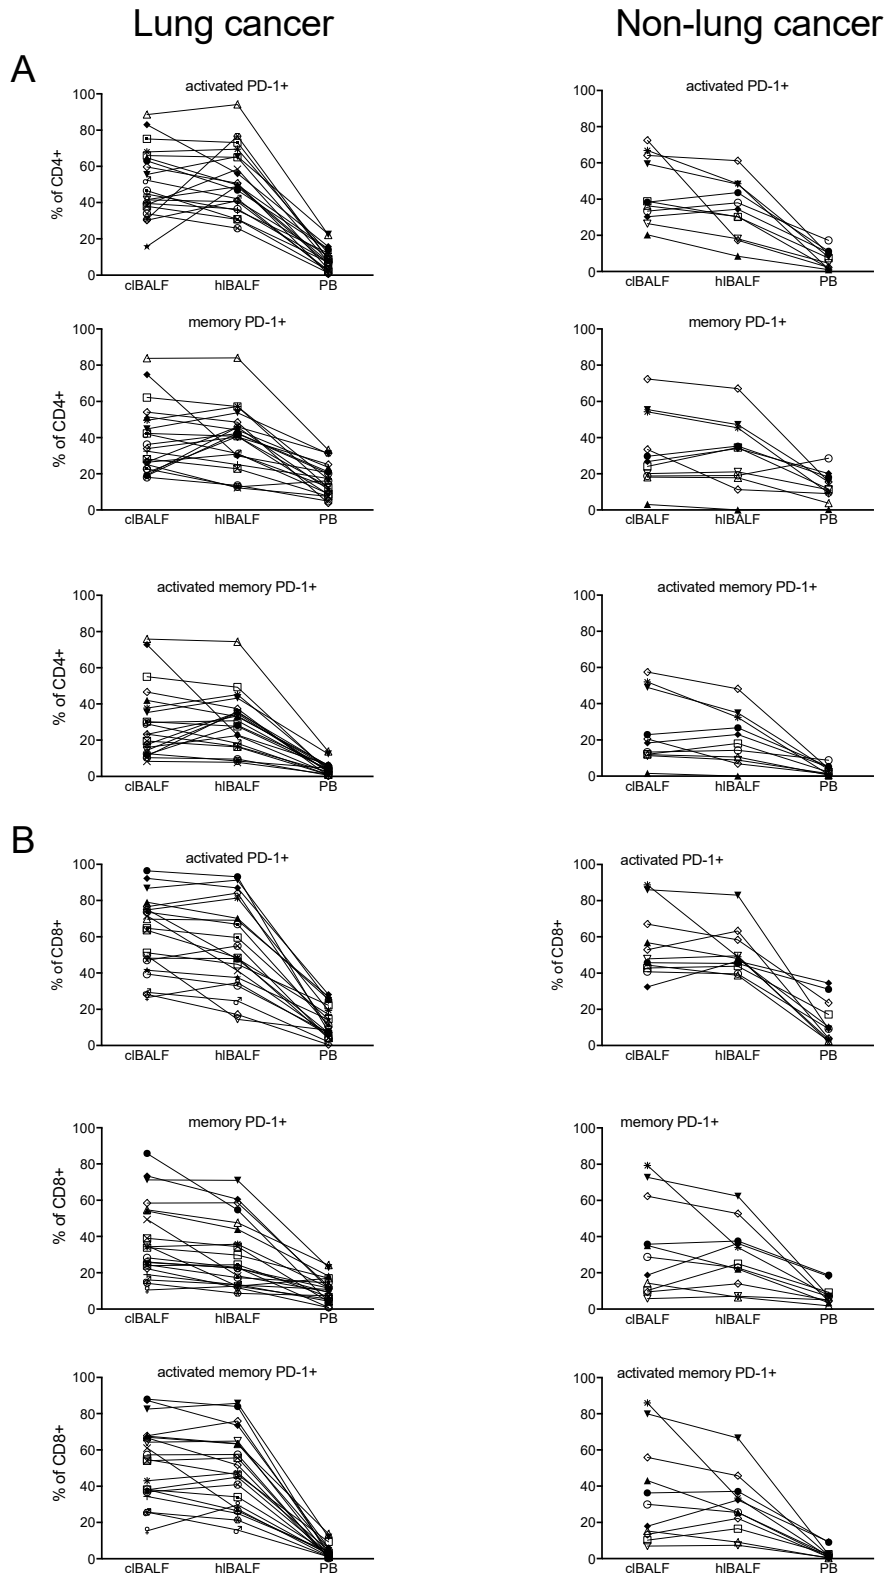

**Figure S3.** PD-1 expression on T cells in lung cancer versus T cells in benign lesions. **(A)** Proportion of activated, memory and activated memory CD4+ PD-1+ in individual patient- comparison of lung cancer patients with patients with benign lung lesions. **(B)** Proportion of activated, memory and activated memory CD8+ PD-1+ in individual patient- comparison of lung cancer patients with patients with benign lung lesions.

**Table S1.** Correlations between proportion of activated CD8+/PD-1+ and other cells in the BALF and PB. Significant:  $r > 0.3$ ,  $p < 0.05$  in Spearman test.

| Events:                       | Groups:   |            |            |
|-------------------------------|-----------|------------|------------|
|                               | cBALF     | hBALF      | PB         |
| CD8+ CTLA-4+                  | $r = 0.5$ | $r = 0.5$  | $r = 0.5$  |
| memory CD8+ PD-1+             | $r = 0.7$ | $r = 0.8$  | $r = 0.6$  |
| memory CD8+ CTLA-4+           | $r = 0.7$ | $r = 0.5$  | $r = 0.5$  |
| naïve CD8+ PD-1+              | -         | $r = 0.5$  | $r = 0.6$  |
| naïve CD8+ CTLA-4+            | -         | -          | $r = 0.4$  |
| activated CD8+ CTLA-4+        | $r = 0.6$ | $r = 0.5$  | $r = 0.6$  |
| activated memory CD8+ CTLA-4+ | $r = 0.6$ | $r = 0.5$  | $r = 0.6$  |
| CD4+ PD-1+                    | $r = 0.4$ | $r = 0.3$  | $r = 0.7$  |
| CD4+ CTLA-4                   | -         | $r = -0.4$ | $r = -0.5$ |
| memory CD4+ PD1+              | -         | -          | $r = 0.6$  |
| naïve CD4+ PD-1+              | $r = 0.4$ | $r = 0.5$  | $r = 0.7$  |
| naïve CD4+ CTLA-4+            | $r = 0.3$ | -          | -          |
| activated CD4+ PD-1+          | $r = 0.3$ | -          | $r = 0.9$  |
| activated CD4+ CTLA-4         | $r = 0.4$ | -          | $r = 0.7$  |
| activated memory CD4+ PD-1+   | -         | -          | $r = 0.8$  |
| activated memory CD4+ CTLA-4  | -         | -          | $r = 0.8$  |

**Table S2.** Correlation between the median proportion of CD8+ and CD4+ cells subpopulation with PD-1 or CTLA-4 expression and smoking history expressed as pack years smoked. Only significant relations are shown,  $p < 0.05$ .

| Events:                       | Groups:    |            |            |
|-------------------------------|------------|------------|------------|
|                               | cBALF      | hBALF      | PB         |
| CD8+ PD-1                     | $r = -0.3$ | -          | $r = -0.4$ |
| activated CD8+ PD-1+          | $r = -0.3$ | -          | $r = -0.3$ |
| memory CD8+ PD-1+             | -          | -          | $r = -0.6$ |
| activated memory CD8+ PD-1+   | -          | -          | $r = -0.3$ |
| naïve CD8+ CTLA-4+            | $r = 0.4$  | $r = 0.3$  | -          |
| CD4+ cells                    | $r = 0.3$  | $r = 0.5$  | -          |
| CD4+ PD-1+                    | -          | $r = -0.6$ | $r = -0.5$ |
| activated CD4+ PD-1+          | -          | $r = -0.6$ | $r = -0.3$ |
| memory CD4+ PD-1+             | $r = -0.3$ | $r = -0.4$ | $r = -0.5$ |
| activated memory CD4+ PD-1+   | -          | $r = -0.4$ | $r = -0.4$ |
| naïve CD4+ PD-1+              | -          | $r = 0.4$  | -          |
| CD4+ CTLA-4                   | -          | $r = -0.3$ | -          |
| activated CD4+ CTLA-4         | -          | $r = -0.5$ | $r = -0.3$ |
| memory CD4+ CTLA-4            | -          | $r = -0.3$ | $r = -0.3$ |
| activated memory CD4+ CTLA-4+ | -          | $r = -0.4$ | $r = -0.4$ |
| naïve CD4+ CTLA-4+            | -          | $r = 0.5$  | -          |
| ratio CD4/CD8                 | $r = 0.3$  | $r = 0.5$  | -          |

**Table S3.** Comparison of lymphocyte subtypes proportion with PD-1 and CTLA-4 expression in patients with lung cancer and benign tumor. Data expressed as median (p25–p75).

| Lymphocyte subset (%)<br>median (p25–p75) | Lung Affected by Tumor |                      | Lung Without Tumor            |                              |
|-------------------------------------------|------------------------|----------------------|-------------------------------|------------------------------|
|                                           | benign tumor           | lung cancer (cIBALF) | Lung opposite to benign tumor | Lung opposite to lung cancer |
| all CD8+PD1+                              | 56.3 (48.6–76.3)       | 68.1 (50.6–79.3)     | 55.0 (49.0–67.7)              | 51.8 (40.9–78.7)             |
| naïve CD8+ PD-1+                          | 1.6 (0.9–3.7)          | 1.5 (1.1–3.3)        | 2.2 (0.8–2.4)                 | 1.8 (0.5–4.3)                |
| memory CD8+ PD-1+                         | 28.8 (10.3–62.4)       | 33.8 (24.0–54.2)     | 25.0 (14.1–37.7)              | 22.9 (13.5–44.0)             |
| activated CD8+ PD-1+                      | 47.9 (42.8–67.0)       | 64.7 (47.1–75.1)     | 48.0 (43.8–58.4)              | 48.4 (37.5–70.2)             |
| activated memory CD8+ PD-1+               | 30.0 (13.4–55.8)       | 30.9 (23.7–57.0)     | 25.6 (16.6–37.1)              | 26.9 (18.1–53.0)             |
| all CD8+ CTLA-4+                          | 60.9 (48.5–76.3)       | 57.9 (45.6–76.3)     | 53.2 (43.5–66.7)              | 52.6 (37.9–80.7)             |
| naïve CD8+ CTLA-4+                        | 3.0 (0.8–7.3)          | 2.7 (1.0–6.4)        | 3.1 (1.1–4.4)                 | 2.7 (0.7–6.0)                |
| memory CD8+ CTLA-4+                       | 32.8 (9.7–45.5)        | 33.7 (17.4–44.2)     | 28.6 (9.0–43.0)               | 26.1 (13.4–43.1)             |
| activated CD8+ CTLA-4+                    | 50.9 (32.4–64.6)       | 49.4 (40.9–71.0)     | 44.6 (31.5–58.0)              | 48.4 (33.4–75.5)             |
| activated memory CD8+ CTLA-4+             | 33.4 (12.4–50.2)       | 35.7 (21.0–48.3)     | 29.5 (7.9–37.6)               | 25.7 (15.9–47.5)             |
| all CD4+PD1+                              | 41.9 (35.4–66.7)       | 52.3 (44.3–68.6)     | 41.6 (32.0–53.0)              | 54.8 (45.4–68.4)             |
| naïve CD4+ PD-1+                          | 2.5 (0.5–9.1)          | 4.9 (1.5–10.1)       | 0.8 (0.5–3.0)                 | 2.0 (0.5–4.9)                |
| memory CD4+ PD-1+                         | 26.8 (18.8–54.2)       | 61.0 (51.0–82.2)     | 34.0 (17.8–45.4)              | 66.5 (54.9–75.5)             |
| activated CD4+ PD-1+                      | 38.4 (30.3–64.1)       | 46.6 (38.9–64.8)     | 34.5 (18.1–48.2)              | 49.4 (40.5–65.1)             |
| activated memory CD4+ PD-1+               | 18.4 (12.0–49.1)       | 23.4 (14.4–37.7)     | 18.0 (8.9–32.4)               | 30.7 (18.2–35.8)             |
| all CD4+ CTLA-4+                          | 99.1 (94.5–99.8)       | 98.5 (92.1–99.2)     | 98.5 (96.4–99.9)              | 99.6 (96.8–99.9)             |
| naïve CD4+ CTLA-4+                        | 7.2 (4.2–10.2)         | 8.3 (5.4–16.1)       | 4.2 (1.6–10.9)                | 7.1 (3.6–11.4)               |
| memory CD4+ CTLA-4+                       | 51.3 (42.7–80.7)       | 60.4 (51.0–82.1)     | 68.0 (37.0–81.0)              | 66.1 (54.8–75.0)             |
| activated CD4+ CTLA-4+                    | 66.5 (48.9–86.7)       | 69.5 (65.0–78.1)     | 63.3 (48.1–69.7)              | 73.5 (57.8–80.0)             |
| activated memory CD4+ CTLA-4+             | 25.5 (15.0–59.0)       | 35.0 (16.7–47.1)     | 30.5 (16.5–41.4)              | 37.1 (27.3–51.7)             |

**Table S4.** Proportion of lymphocyte subtypes with PD-1 and CTLA-4 expression in patients with benign lesions in the BALF from tumor site (cIBALF), opposite lung (hIBALF) and peripheral blood (PB). Data expressed as median (p25–p75).

| Lymphocyte Subset (%)<br>Median (p25–p75) | A. cIBALF<br>n = 11 | B. hIBALF<br>n = 11 | C. PB<br>n = 11     | p < 0,05 * Group A-B-C<br>ANOVA Kruskal-Wallis | p < 0.05 * Group IN GROUPS<br>POST-HOC |
|-------------------------------------------|---------------------|---------------------|---------------------|------------------------------------------------|----------------------------------------|
| Lymphocytes                               | 29.2<br>(16.8–37.0) | 25.7<br>(10.2–41.3) | 28.3<br>(25.6–36.7) | 0.9288                                         | -                                      |
| T cells CD3+ (% of all cells)             | 13.0<br>(8.4–23.4)  | 13.2<br>(4.1–20.3)  | 19.4<br>(15.0–23.2) | 0.2379                                         | -                                      |
| T cells CD3+ (% of all lymphocytes)       | 55.2<br>(42.8–74.7) | 51.8<br>(37.0–61.6) | 59.0<br>(57.9–66.7) | 0.1214                                         | -                                      |
| CD8+ (% of T cells)                       | 33.5<br>(16.3–44.7) | 26.9<br>(21.8–41.9) | 33.5<br>(28.3–37.1) | 0.5305                                         | -                                      |
| CD4+ (% of T cells)                       | 23.7<br>(10.0–40.6) | 33.0<br>(8.3–45.7)  | 57.5<br>(40.1–61.8) | 0.0167                                         | A-C: 0.0229                            |
| Ratio CD4: CD8                            | 0.8<br>(0.5–1.7)    | 0.9<br>(0.5–2.0)    | 1.7<br>(1.1–2.2)    | 0.1657                                         | -                                      |
| CD8+ subpopulation: (% of CD8+ cells)     |                     |                     |                     |                                                |                                        |
| all CD8+PD1+                              | 56.3<br>(48.6–76.3) | 55.0<br>(49.0–67.7) | 23.1<br>(12.9–42.0) | 0.0001                                         | A-C: 0.0007<br>B-C: 0.0008             |
| all CD8+CTLA-4+                           | 60.9<br>(48.5–76.3) | 53.2<br>(43.5–66.7) | 3.6<br>(2.2–41.2)   | 0.0007                                         | A-C: 0.0019<br>B-C: 0.0042             |
| naïve CD8+                                | 6.4<br>(1.6–8.7)    | 3.9<br>(1.5–8.8)    | 30.9<br>(23.8–36.4) | <0.0001                                        | A-C: 0.0003<br>B-C: 0.0001             |
| naïve CD8+ PD-1+                          | 1.6<br>(0.9–3.7)    | 2.2<br>(0.8–2.4)    | 3.1<br>(0.9–11.1)   | 0.4338                                         | -                                      |
| naïve CD8+ CTLA-4+                        | 3.0                 | 3.1                 | 0.2                 | 0.5005                                         | -                                      |

|                                       |                     |                     |                       |         |                            |
|---------------------------------------|---------------------|---------------------|-----------------------|---------|----------------------------|
|                                       | (0.8–7.3)           | (1.1–4.4)           | (0.1–11.2)            |         | -                          |
| memory CD8+                           | 45.7<br>(16.2–75.9) | 37.5<br>(19.3–67.2) | 22.7<br>(16.2–29.4)   | 0.0503  | -                          |
| memory CD8+ PD-1+                     | 28.8<br>(10.3–62.4) | 25.0<br>(14.1–37.7) | 6.9<br>(4.4–9.2)      | 0.0012  | A-C: 0.0039<br>B-C: 0.0052 |
| memory CD8+ CTLA-4+                   | 32.8<br>(9.7–45.5)  | 28.6<br>(9.0–43.0)  | 2.0<br>(1.0–8.7)      | 0.0004  | A-C: 0.0014<br>B-C: 0.0028 |
| activated CD8+                        | 86.0<br>(73.9–91.0) | 76.8<br>(70.6–89.3) | 20.9<br>(8.3–38.4)    | <0.0001 | A-C: 0.0001<br>B-C: 0.0012 |
| activated CD8+ PD-1+                  | 47.9<br>(42.8–67.0) | 48.0<br>(43.8–58.4) | 9.2<br>(3.3–23.5)     | <0.0001 | A-C: 0.0002<br>B-C: 0.0003 |
| activated CD8+ CTLA-4+                | 50.9<br>(32.4–64.6) | 44.6<br>(31.5–58.0) | 0.2<br>(0.0–10.4)     | 0.0001  | A-C: 0.0002<br>B-C: 0.0014 |
| activated memory CD8+                 | 46.8<br>(19.0–66.7) | 42.5<br>(20.4–49.5) | 1.7<br>(0.8–2.6)      | <0.0001 | A-C: 0.0001<br>B-C: 0.0003 |
| activated memory CD8+ PD-1+           | 30.0<br>(13.4–55.8) | 25.6<br>(16.6–37.1) | 1.7<br>(0.7–2.5)      | 0.0001  | A-C: 0.0003<br>B-C: 0.0005 |
| activated memory CD8+ CTLA-4+         | 33.4<br>(12.4–50.2) | 29.5<br>(7.9–37.6)  | 0.1<br>(0.0–1.4)      | <0.0001 | A-C: 0.0001<br>B-C: 0.0004 |
| CD4+ subpopulation: (% of CD4+ cells) |                     |                     |                       |         |                            |
| all CD4+PD1+                          | 41.9<br>(35.4–66.7) | 41.6<br>(32.0–53.0) | 24.7<br>(12.5–30.4)   | 0.0014  | A-C: 0.0014<br>B-C: 0.0297 |
| all CD4+CTLA-4+                       | 99.1<br>(94.5–99.8) | 98.5<br>(96.4–99.9) | 100.0<br>(99.5–100.0) | 0.0611  | -                          |
| naïve CD4+                            | 8.3<br>(4.3–19.1)   | 5.6<br>(1.6–11.3)   | 35.4<br>(24.7–42.6)   | 0.0013  | A-C: 0.0153<br>B-C: 0.0019 |
| naïve CD4+ PD-1+                      | 2.5<br>(0.5–9.1)    | 0.8<br>(0.5–3.0)    | 1.8<br>(0.3–2.3)      | 0.4300  | -                          |
| naïve CD4+ CTLA-4+                    | 7.2<br>(4.2–10.2)   | 4.2<br>(1.6–10.9)   | 30.3<br>(17.0–39.1)   | 0.0007  | A-C: 0.0105<br>B-C: 0.0011 |
| memory CD4+                           | 51.4<br>(42.7–81.1) | 69.0<br>(37.0–81.0) | 39.0<br>(36.4–53.6)   | 0.1193  | -                          |
| memory CD4+ PD-1+                     | 26.8<br>(18.8–54.2) | 34.0<br>(17.8–45.4) | 11.6<br>(9.1–18.1)    | 0.0093  | A-C: 0.0188<br>B-C: 0.0316 |
| memory CD4+ CTLA-4+                   | 51.3<br>(42.7–80.7) | 68.0<br>(37.0–81.0) | 38.9<br>(36.4–53.6)   | 0.1182  | -                          |
| activated CD4+                        | 67.3<br>(50–86.7)   | 64.0<br>(48.1–69.7) | 8.0<br>(2.4–16.4)     | <0.0001 | A-C: 0.0001<br>B-C: 0.0008 |
| activated CD4+ PD-1+                  | 38.4<br>(30.3–64.1) | 34.5<br>(18.1–48.2) | 7.4<br>(1.9–10.4)     | <0.0001 | A-C: 0.0001<br>B-C: 0.0017 |
| activated CD4+ CTLA-4+                | 66.5<br>(48.9–86.7) | 63.3<br>(48.1–69.7) | 7.6<br>(2.1–16.3)     | 0.0002  | A-C: 0.0004<br>B-C: 0.0026 |
| activated memory CD4+                 | 25.5<br>(15.0–59.1) | 30.5<br>(16.5–41.4) | 2.4<br>(0.8–5.2)      | 0.0002  | A-C: 0.0008<br>B-C: 0.0017 |
| activated memory CD4+ PD-1            | 18.4<br>(12.0–49.1) | 18.0<br>(8.9–32.4)  | 2.3<br>(0.8–5.0)      | 0.0004  | A-C: 0.0008<br>B-C: 0.0045 |
| activated memory CD4+ CTLA-4+         | 25.5<br>(15.0–59.0) | 30.5<br>(16.5–41.4) | 2.4<br>(0.8–5.2)      | 0.0005  | A-C: 0.0019<br>B-C: 0.0023 |

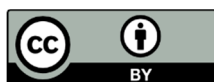

Supplement: s1 [file s1]
